# Supplementary material
Source: PubMed Central journal article supplement (PMC3347453)
Supplement: supp_80.5.1690_IAI-IAI06176-11-s01.pdf [file supp_80.5.1690_IAI-IAI06176-11-s01.pdf]

## Supplementary Tables

**Table S1. *C. jejuni* 11168H genes up-regulated after 6 h of co-culturing with Caco-2 IECs in the VDC with microaerobic conditions in the apical compartment.**

| ORF number     | Fold change | Re-annotation                                                             |
|----------------|-------------|---------------------------------------------------------------------------|
| <i>Cj1511c</i> | 2.3         | <i>fdhA</i> putative formate dehydrogenase large subunit                  |
| <i>Cj1705c</i> | 2.0         | binds third domain of 23S rRNA and protein L29; part of exit tunnel       |
| <i>Cj1186c</i> | 2.0         | <i>petA</i> putative ubiquinol-cytochrome C reductase iron-sulfur subunit |
| <i>Cj1325</i>  | 1.9         | putative methyltransferase                                                |
| <i>Cj0347</i>  | 1.9         | <i>rpF</i> N-(5'-phosphoribosyl) anthranilate isomerase                   |
| <i>Cj0414</i>  | 1.8         | putative oxidoreductase subunit                                           |
| <i>Cj0473</i>  | 1.7         | <i>nusG</i> transcription antitermination protein NusG                    |
| <i>Cj0207</i>  | 1.6         | translation initiation factor IF-3                                        |
| <i>Cj1591</i>  | 1.6         | 50S ribosomal protein L36                                                 |
| <i>Cj0330c</i> | 1.6         | 50S ribosomal protein L32                                                 |
| <i>Cj1439c</i> | 1.6         | <i>glf</i> UDP-galactopyranose mutase part of the capsule locus           |
| <i>Cj0859c</i> | 1.6         | hypothetical protein                                                      |
| <i>Cj1267c</i> | 1.6         | <i>hydA</i> Ni/Fe-hydrogenase small chain                                 |
| <i>Cj0581</i>  | 1.5         | dinucleoside polyphosphate hydrolase                                      |
| <i>Cj0329c</i> | 1.5         | putative glycerol-3-phosphate acyltransferase PlsX                        |
| <i>Cj1027c</i> | 1.5         | <i>gyrA</i> DNA gyrase subunit A                                          |
| <i>Cj0007</i>  | 1.5         | <i>gltB</i> glutamate synthase large subunit                              |
| <i>Cj1028c</i> | 1.5         | putative purine/pyrimidine phosphoribosyltransferase                      |
| <i>Cj0397c</i> | 1.5         | hypothetical protein                                                      |
| <i>Cj0519</i>  | 1.5         | putative rhodanese-like domain protein                                    |
| <i>Cj0995c</i> | 1.5         | <i>hemB</i> delta-aminolevulinic acid dehydratase                         |
| <i>Cj0802</i>  | 1.5         | cysteinyI-tRNA synthetase                                                 |
| <i>Cj0315</i>  | 1.5         | putative HAD-superfamily hydrolase                                        |
| <i>Cj0398</i>  | 1.4         | <i>gatC</i> aspartyl/glutamyl-tRNA amidotransferase subunit C             |
| <i>Cj0462</i>  | 1.4         | hypothetical protein                                                      |
| <i>Cj1223c</i> | 1.4         | <i>dccR</i> two-component response regulator                              |
| <i>Cj1172c</i> | 1.4         | hypothetical protein                                                      |
| <i>Cj0953c</i> | 1.4         | <i>urH</i> de novo purine biosynthesis                                    |
| <i>Cj0961c</i> | 1.4         | 50S ribosomal protein L34                                                 |
| <i>Cj0092</i>  | 1.4         | putative periplasmic protein                                              |
| <i>Cj0789</i>  | 1.4         | <i>cca</i> putative multifunctional Cca protein RNA synthesis             |
| <i>Cj1621</i>  | 1.3         | putative periplasmic protein                                              |
| <i>Cj0271</i>  | 1.3         | bacterioferritin comigratory protein homolog                              |
| <i>Cj0348</i>  | 1.3         | <i>trpB</i> tryptophan synthase subunit beta                              |

|                |     |                                                     |
|----------------|-----|-----------------------------------------------------|
| <i>Cj0320</i>  | 1.3 | <i>fliH</i> flagellar assembly protein H            |
| <i>Cj0146c</i> | 1.3 | <i>trxB</i> thioredoxin reductase                   |
| <i>Cj0498</i>  | 1.3 | <i>trpC</i> indole-3-glycerol-phosphate synthase    |
| <i>Cj0237</i>  | 1.3 | <i>cynT</i> carbonic anhydrase                      |
| <i>Cj0976</i>  | 1.3 | putative methyltransferase                          |
| <i>Cj0891c</i> | 1.2 | <i>serA</i> D-3-phosphoglycerate dehydrogenase      |
| <i>Cj0934c</i> | 1.2 | putative sodium:amino-acid symporter family protein |
| <i>Cj0055c</i> | 1.2 | hypothetical protein                                |
| <i>Cj0552</i>  | 1.2 | hydrophobic protein                                 |

**Table S2. *C. jejuni* 11168H genes down-regulated after 6 h of co-culturing with Caco-2 IECs in the VDC with microaerobic conditions in the apical compartment.**

| <b>ORF number</b> | <b>Fold change</b> | <b>Re-annotation</b>                                             |
|-------------------|--------------------|------------------------------------------------------------------|
| <i>Cj0304c</i>    | 1.3                | <i>bioC</i> putative biotin synthesis protein                    |
| <i>Cj0522</i>     | 1.3                | putative Na <sup>+</sup> /Pi cotransporter protein               |
| <i>Cj1634c</i>    | 1.3                | chorismate synthase                                              |
| <i>Cj0410</i>     | 1.4                | fumarate reductase iron-sulfur protein                           |
| <i>Cj0486</i>     | 1.4                | possible L-fucose symporter                                      |
| <i>Cj0303c</i>    | 1.4                | <i>modA</i> putative molybdate-binding lipoprotein               |
| <i>Cj1666c</i>    | 1.4                | putative periplasmic protein                                     |
| <i>Cj0988c</i>    | 1.5                | very hypothetical protein                                        |
| <i>Cj1079</i>     | 1.5                | putative periplasmic protein                                     |
| <i>Cj1134</i>     | 1.5                | <i>htrB</i> lipid A biosynthesis lauroyl acyltransferase         |
| <i>Cj0728</i>     | 1.6                | putative periplasmic protein                                     |
| <i>Cj0590</i>     | 1.6                | putative SAM-dependent methyltransferase                         |
| <i>Cj0737</i>     | 1.6                | putative hemagglutination activity domain-containing protein     |
| <i>Cj0560</i>     | 1.7                | putative MATE family transport protein                           |
| <i>Cj1521c</i>    | 1.7                | putative CRISPR-associated protein                               |
| <i>Cj0290c</i>    | 1.8                | pseudogene (partial <i>glpT</i> )                                |
| <i>Cj1581c</i>    | 1.9                | putative peptide ABC transporter ATP-binding protein             |
| <i>Cj0302c</i>    | 2.0                | putative molybdenum-pterin binding protein                       |
| <i>Cj0141c</i>    | 2.0                | putative ABC transporter integral membrane protein               |
| <i>Cj0422c</i>    | 2.0                | putative H-T-H containing protein                                |
| <i>Cj1378</i>     | 2.2                | <i>selA</i> selenocysteine synthase                              |
| <i>Cj1352</i>     | 2.3                | <i>ceuB</i> enterochelin uptake permease                         |
| <i>Cj1629</i>     | 2.5                | <i>exbD2</i> putative <i>exbD</i> /toIR family transport protein |
| <i>Cj1393</i>     | 2.6                | <i>metC'</i> putative cystathionine beta-lyase                   |

**Table S3. *C. jejuni* 11168H genes upregulated after 24 h of co-culturing with Caco-2 IECs in the VDC with microaerobic conditions in the apical compartment.**

| <b>ORF number</b> | <b>Fold change</b> | <b>Re-annotation</b>                                                      |
|-------------------|--------------------|---------------------------------------------------------------------------|
| <i>Cj1325</i>     | 2.8                | putative methyltransferase                                                |
| <i>Cj1176c</i>    | 2.2                | <i>tatA</i> Sec-independent protein translocase                           |
| <i>Cj0985c</i>    | 2.1                | <i>hipO</i> hippurate hydrolase                                           |
| <i>Cj0073c</i>    | 2.1                | hypothetical protein                                                      |
| <i>Cj0922c</i>    | 2.1                | <i>pebC</i> amino-acid ABC transporter ATP-binding protein                |
| <i>Cj1326</i>     | 2.0                | hypothetical protein                                                      |
| <i>Cj0347</i>     | 2.0                | <i>trpF</i> N-(5'-phosphoribosyl)anthranilate isomerase                   |
| <i>Cj0592c</i>    | 1.9                | putative periplasmic protein                                              |
| <i>Cj0920c</i>    | 1.9                | putative ABC-type amino-acid transporter permease                         |
| <i>Cj0628</i>     | 1.8                | putative lipoprotein                                                      |
| <i>Cj0127c</i>    | 1.8                | <i>accD</i> acetyl-CoA carboxylase subunit beta                           |
| <i>Cj1558</i>     | 1.8                | hypothetical protein                                                      |
| <i>Cj1273c</i>    | 1.8                | <i>rpoZ</i> DNA-directed RNA polymerase subunit omega                     |
| <i>Cj0346</i>     | 1.6                | <i>trpD</i> anthranilate synthase component II                            |
| <i>Cj1172c</i>    | 1.6                | hypothetical protein                                                      |
| <i>Cj1668c</i>    | 1.6                | putative periplasmic protein                                              |
| <i>Cj1560</i>     | 1.6                | pseudogene                                                                |
| <i>Cj0802</i>     | 1.6                | <i>cysS</i> cysteinyl-tRNA synthetase                                     |
| <i>Cj0813</i>     | 1.6                | <i>kdsB</i> 3-deoxy-manno-octulosonate cytidyltransferase                 |
| <i>Cj0459c</i>    | 1.6                | hypothetical protein                                                      |
| <i>Cj0029</i>     | 1.6                | <i>ansA</i> cytoplasmic L-asparaginase                                    |
| <i>Cj1321</i>     | 1.6                | putative transferase LSO                                                  |
| <i>Cj1193c</i>    | 1.6                | putative periplasmic protein                                              |
| <i>Cj0152c</i>    | 1.6                | hypothetical protein                                                      |
| <i>Cj1345c</i>    | 1.5                | putative periplasmic protein                                              |
| <i>Cj0244</i>     | 1.5                | <i>rpmI</i> 50S ribosomal protein L35                                     |
| <i>Cj1186c</i>    | 1.5                | <i>petA</i> putative ubiquinol-cytochrome C reductase iron-sulfur subunit |
| <i>Cj1639</i>     | 1.5                | NifU protein                                                              |
| <i>Cj1503c</i>    | 1.5                | <i>putA</i> putative /Δ-1-pyrroline-5-carboxylate dehydrogenase           |
| <i>Cj1705c</i>    | 1.5                | 50S ribosomal protein L23                                                 |
| <i>Cj0960c</i>    | 1.5                | putative ribonuclease P protein component                                 |
| <i>Cj0330c</i>    | 1.5                | 50S ribosomal protein L32                                                 |
| <i>Cj0898</i>     | 1.5                | putative histidine triad (HIT) family protein                             |

|                |     |                                                                |
|----------------|-----|----------------------------------------------------------------|
| <i>Cj1603</i>  | 1.5 | <i>hisF</i> imidazole glycerol phosphate synthase subunit HisF |
| <i>Cj1681c</i> | 1.5 | <i>cysQ</i> CysQ protein                                       |
| <i>Cj0685c</i> | 1.5 | <i>cipA</i> invasion protein CipA                              |
| <i>Cj0092</i>  | 1.4 | putative periplasmic protein                                   |
| <i>Cj1616</i>  | 1.4 | <i>chuC</i> putative hemin uptake system ATP-binding protein   |
| <i>Cj0912c</i> | 1.4 | <i>cysM</i> cysteine synthase                                  |
| <i>Cj1207c</i> | 1.4 | putative lipoprotein thioredoxin                               |
| <i>Cj0771c</i> | 1.4 | putative NLPA family lipoprotein                               |
| <i>Cj0129c</i> | 1.4 | outer membrane protein                                         |
| <i>Cj0070c</i> | 1.4 | hypothetical protein                                           |
| <i>Cj1719c</i> | 1.4 | <i>eua</i> 2-isopropylmalate synthase                          |
| <i>Cj0371</i>  | 1.4 | hypothetical protein                                           |
| <i>Cj0234c</i> | 1.4 | <i>frr</i> ribosome recycling factor                           |
| <i>Cj0507</i>  | 1.4 | <i>maf</i> Maf-like protein                                    |
| <i>Cj1541</i>  | 1.4 | LamB/YcsF family protein                                       |
| <i>Cj0979c</i> | 1.4 | putative secreted nuclease                                     |
| <i>Cj0362</i>  | 1.3 | putative integral membrane protein                             |
| <i>Cj0914c</i> | 1.3 | CiaB protein                                                   |
| <i>Cj0089</i>  | 1.3 | putative lipoprotein                                           |
| <i>Cj1537c</i> | 1.3 | <i>acs</i> acetyl-CoA synthetase                               |
| <i>Cj0407</i>  | 1.3 | <i>lgt</i> prolipoprotein diacylglyceryl transferase           |
| <i>Cj0290c</i> | 1.3 | pseudogene                                                     |
| <i>Cj0489</i>  | 1.3 | <i>ald'</i> putative aldehyde dehydrogenase N-terminus         |
| <i>Cj0424</i>  | 1.3 | putative acidic periplasmic protein                            |
| <i>Cj1508c</i> | 1.3 | <i>fdhD</i> formate dehydrogenase accessory protein            |
| <i>Cj1543</i>  | 1.3 | putative allophanate hydrolase subunit 2                       |
| <i>Cj0854c</i> | 1.3 | putative periplasmic protein                                   |
| <i>Cj0466</i>  | 1.3 | <i>nssR</i> transcriptional regulator                          |
| <i>Cj0473</i>  | 1.3 | <i>nusG</i> transcription antitermination protein NusG         |
| <i>Cj0682</i>  | 1.2 | hypothetical protein                                           |
| <i>Cj1115c</i> | 1.2 | putative phosphatidylserine decarboxylase-related protein      |
| <i>Cj0068</i>  | 1.2 | <i>pspA</i> protease                                           |
| <i>Cj1254</i>  | 1.2 | hypothetical protein                                           |
| <i>Cj0099</i>  | 1.2 | <i>birA</i> biotin--protein ligase                             |
| <i>Cj0808c</i> | 1.2 | hypothetical protein                                           |
| <i>Cj0408</i>  | 1.2 | <i>frdC</i> fumarate reductase cytochrome b-556 subunit        |
| <i>Cj0460</i>  | 1.2 | <i>nusA</i> transcription elongation factor NusA               |
| <i>Cj1504c</i> | 1.2 | <i>selD</i> putative selenide,water dikinase                   |
| <i>Cj0734c</i> | 1.1 | <i>hisJ</i> histidine-binding protein precursor                |

|                |     |                                             |
|----------------|-----|---------------------------------------------|
| <i>Cj0306c</i> | 1.1 | <i>bioF</i> 8-amino-7-oxononanoate synthase |
|----------------|-----|---------------------------------------------|

**Table S4. *C. jejuni* 11168H genes down-regulated after 24 h of co-culturing with Caco-2 IECs in the VDC with microaerobic conditions in the apical compartment.**

| <b>ORF number</b> | <b>Fold change</b> | <b>Re-annotation</b>                                           |
|-------------------|--------------------|----------------------------------------------------------------|
| <i>Cj1680c</i>    | 1.1                | putative periplasmic protein                                   |
| <i>Cj1447c</i>    | 1.1                | <i>kpsT</i> capsule polysaccharide export ATP-binding protein  |
| <i>Cj0642</i>     | 1.2                | <i>recN</i> putative DNA repair protein                        |
| <i>Cj0843c</i>    | 1.1                | putative secreted transglycosylase                             |
| <i>Cj1234</i>     | 1.1                | <i>glyS</i> glycyl-tRNA synthetase subunit bet                 |
| <i>Cj0847</i>     | 1.1                | <i>psd</i> phosphatidylserine decarboxylase                    |
| <i>Cj1241</i>     | 1.1                | putative MFS transport protein arabinose efflux                |
| <i>Cj1040c</i>    | 1.2                | putative MFS transport protein cyanate transport               |
| <i>Cj1484c</i>    | 1.2                | putative membrane protein                                      |
| <i>Cj1600</i>     | 1.2                | <i>hisH</i> imidazole glycerol phosphate synthase subunit HisH |
| <i>Cj0272</i>     | 1.2                | hypothetical protein                                           |
| <i>Cj0343c</i>    | 1.2                | putative integral membrane protein                             |
| <i>Cj0238</i>     | 1.2                | putative mechanosensitive ion channel family protein           |
| <i>Cj0652</i>     | 1.2                | <i>pbpC</i> penicillin-binding protein                         |
| <i>Cj0574</i>     | 1.2                | <i>ilvI</i> acetolactate synthase 3 catalytic subunit          |
| <i>Cj0319</i>     | 1.2                | <i>fliG</i> flagellar motor switch protein G                   |
| <i>Cj1655c</i>    | 1.2                | <i>nhaA1</i> Na(+)/H(+) antiporter                             |
| <i>Cj0720c</i>    | 1.2                | <i>flaC</i> flagellin                                          |
| <i>Cj0850c</i>    | 1.3                | putative MFS transport protein Sugar transporter               |
| <i>Cj0265c</i>    | 1.3                | putative cytochrome C-type haem-binding periplasmic protein    |
| <i>Cj0849c</i>    | 1.3                | hypothetical protein                                           |
| <i>Cj0549</i>     | 1.3                | <i>fliS</i> flagellar protein FliS                             |
| <i>Cj1294</i>     | 1.3                | <i>pseC</i> C4 aminotransferase                                |
| <i>Cj0453</i>     | 1.3                | <i>thiC</i> thiamine biosynthesis protein ThiC                 |
| <i>Cj0931c</i>    | 1.3                | <i>argH</i> argininosuccinate lyase                            |
| <i>Cj0174c</i>    | 1.3                | <i>cfbpB</i> putative iron-uptake ABC transporter permease     |
| <i>Cj0241c</i>    | 1.3                | putative iron-binding protein                                  |
| <i>Cj1440c</i>    | 1.3                | putative sugar transferase capsule locus                       |
| <i>Cj0846</i>     | 1.3                | putative metallophosphoesterase                                |
| <i>Cj0293</i>     | 1.3                | <i>surE</i> stationary phase survival protein SurE             |
| <i>Cj1685c</i>    | 1.4                | <i>bioB</i> biotin synthase                                    |
| <i>Cj1669c</i>    | 1.4                | DNA ligase                                                     |
| <i>Cj1686c</i>    | 1.4                | <i>topA</i> DNA topoisomerase I                                |
| <i>Cj1277c</i>    | 1.4                | putative ABC transporter ATP-binding protein                   |

|                |     |                                                                                 |
|----------------|-----|---------------------------------------------------------------------------------|
| <i>Cj1555c</i> | 1.4 | hypothetical protein                                                            |
| <i>Cj0263</i>  | 1.4 | <i>zupT</i> zinc transporter ZupT                                               |
| <i>Cj0053c</i> | 1.4 | <i>mnmA</i> tRNA-specific 2-thiouridylase MnmA                                  |
| <i>Cj1425c</i> | 1.5 | <i>hddA</i> putative D-glycero-D-manno-heptose 7-phosphate kinase capsule locus |
| <i>Cj0081</i>  | 1.5 | <i>cydA</i> cytochrome bd oxidase subunit I                                     |
| <i>Cj1119c</i> | 1.5 | <i>pglG</i> putative integral membrane protein                                  |
| <i>Cj0316</i>  | 1.5 | <i>pheA</i> chorismate mutase/prephenate dehydratase                            |
| <i>Cj1085c</i> | 1.6 | <i>mfd</i> transcription-repair coupling factor                                 |
| <i>Cj1224</i>  | 1.6 | putative iron-binding protein                                                   |
| <i>Cj0303c</i> | 1.6 | <i>modA</i> putative molybdate-binding lipoprotein                              |
| <i>Cj0456c</i> | 1.6 | hypothetical protein                                                            |
| <i>Cj1138</i>  | 1.6 | putative glycosyltransferase LOS                                                |
| <i>Cj0439</i>  | 1.6 | <i>dhC</i> putative succinate dehydrogenase subunit C                           |
| <i>Cj1098</i>  | 1.7 | <i>pyrB</i> aspartate carbamoyltransferase catalytic subunit                    |
| <i>Cj0111</i>  | 1.7 | periplasmic protein                                                             |
| <i>Cj1529c</i> | 1.7 | <i>purM</i> phosphoribosylaminoimidazole synthetase                             |
| <i>Cj0082</i>  | 1.7 | <i>cydB</i> cytochrome bd oxidase subunit II                                    |
| <i>Cj0480c</i> | 1.7 | H-T-H motif                                                                     |
| <i>Cj0437</i>  | 1.7 | <i>sdhA</i> succinate dehydrogenase flavoprotein subunit                        |
| <i>Cj0198c</i> | 1.7 | recombination factor protein RarA                                               |
| <i>Cj0501</i>  | 1.8 | pseudo                                                                          |
| <i>Cj0032</i>  | 1.9 | putative type IIS restriction /modification enzyme, C-terminal half             |
| <i>Cj1170c</i> | 2.1 | omp50 50 kda outer membrane protein precursor                                   |
| <i>Cj0017c</i> | 2.4 | <i>dsbI</i> disulphide bond formation protein                                   |
| <i>Cj0799c</i> | 2.9 | <i>ruvA</i> Holliday junction DNA helicase RuvA                                 |
